# Supplementary material
Source: publisher figshare collection journal article supplement (https://sage.figshare.com/ndownloader/files/23482635)
Supplement: Supplementary file 1 [file 23482635]

## Sheet: Sheet1
Complement System
Symbol	Entrez Gene Name	GenPept/UniProt/Swiss-Prot Accession	Expr Fold Change	Expr p-value	Expected	Location	Type(s)	Biomarker Application(s)	Drug(s)	Entrez Gene ID for Human	Entrez Gene ID for Mouse	Entrez Gene ID for Rat
C3	complement C3	P01024	1.204	0.0264	Up	Extracellular Space	peptidase	efficacy	APL-2,IgG	718	12266	24232
C9	complement C9	P02748	1.594	0.0133		Extracellular Space	other	unspecified application		735	12279	117512
C1S	complement C1s	P09871	1.978	0.031	Up	Extracellular Space	peptidase		SERPING1,sutimlimab	716	50908|317677	192262
C4A/C4B	complement C4A (Rodgers blood group)	P0C0L5	1.597	0.0422	Up	Extracellular Space	other		IgG	720|721	12268|625018	24233|406161
C8A	complement C8 alpha chain	P07357	1.349	0.0422		Extracellular Space	other			731	230558	298288
C8B	complement C8 beta chain	P07358	1.216	0.0422		Extracellular Space	other			732	110382	313421
C8G	complement C8 gamma chain	P07360	1.334	0.0189		Extracellular Space	transporter			733	69379	296545
LXR/RXR Activation
Symbol	Entrez Gene Name	GenPept/UniProt/Swiss-Prot Accession	Expr Fold Change	Expr p-value	Expected	Location	Type(s)	Biomarker Application(s)	Drug(s)	Entrez Gene ID for Human	Entrez Gene ID for Mouse	Entrez Gene ID for Rat
APOC1	apolipoprotein C1	P02654	-1.776	0.0189	Up	Extracellular Space	transporter	prognosis,unspecified application		341
APOD	apolipoprotein D	P05090	-1.419	0.0264	Up	Extracellular Space	transporter	safety		347	11815	25239
APOH	apolipoprotein H	P02749	1.203	0.049	Up	Extracellular Space	transporter	unspecified application		350	11818	287774
C3	complement C3	P01024	1.204	0.0264	Up	Extracellular Space	peptidase	efficacy	APL-2,IgG	718	12266	24232
C9	complement C9	P02748	1.594	0.0133	Up	Extracellular Space	other	unspecified application		735	12279	117512
C4A/C4B	complement C4A (Rodgers blood group)	P0C0L5	1.597	0.0422	Up	Extracellular Space	other		IgG	720|721	12268|625018	24233|406161
PLTP	phospholipid transfer protein	P55058	-1.883	0.0363	Up	Extracellular Space	enzyme			5360	18830	296371
PON1	paraoxonase 1	P27169	-1.551	0.049	Up	Extracellular Space	phosphatase	efficacy,unspecified application		5444	18979	84024
FXR/RXR Activation
Symbol	Entrez Gene Name	GenPept/UniProt/Swiss-Prot Accession	Expr Fold Change	Expr p-value	Expected	Location	Type(s)	Biomarker Application(s)	Drug(s)	Entrez Gene ID for Human	Entrez Gene ID for Mouse	Entrez Gene ID for Rat
APOC1	apolipoprotein C1	P02654	-1.776	0.0189		Extracellular Space	transporter	prognosis,unspecified application		341
APOD	apolipoprotein D	P05090	-1.419	0.0264		Extracellular Space	transporter	safety		347	11815	25239
APOH	apolipoprotein H	P02749	1.203	0.049		Extracellular Space	transporter	unspecified application		350	11818	287774
C3	complement C3	P01024	1.204	0.0264		Extracellular Space	peptidase	efficacy	APL-2,IgG	718	12266	24232
C9	complement C9	P02748	1.594	0.0133		Extracellular Space	other	unspecified application		735	12279	117512
C4A/C4B	complement C4A (Rodgers blood group)	P0C0L5	1.597	0.0422		Extracellular Space	other		IgG	720|721	12268|625018	24233|406161
PLTP	phospholipid transfer protein	P55058	-1.883	0.0363		Extracellular Space	enzyme			5360	18830	296371
PON1	paraoxonase 1	P27169	-1.551	0.049		Extracellular Space	phosphatase	efficacy,unspecified application		5444	18979	84024
Acute Phase Response Signaling
Symbol	Entrez Gene Name	GenPept/UniProt/Swiss-Prot Accession	Expr Fold Change	Expr p-value	Expected	Location	Type(s)	Biomarker Application(s)	Drug(s)	Entrez Gene ID for Human	Entrez Gene ID for Mouse	Entrez Gene ID for Rat
APOH	apolipoprotein H	P02749	1.203	0.049	Down	Extracellular Space	transporter	unspecified application		350	11818	287774
C3	complement C3	P01024	1.204	0.0264	Up	Extracellular Space	peptidase	efficacy	APL-2,IgG	718	12266	24232
C9	complement C9	P02748	1.594	0.0133		Extracellular Space	other	unspecified application		735	12279	117512
C1S	complement C1s	P09871	1.978	0.031		Extracellular Space	peptidase		SERPING1,sutimlimab	716	50908|317677	192262
C4A/C4B	complement C4A (Rodgers blood group)	P0C0L5	1.597	0.0422		Extracellular Space	other		IgG	720|721	12268|625018	24233|406161
CP	ceruloplasmin	P00450	1.149	0.049	Up	Extracellular Space	enzyme	efficacy		1356	12870	24268
CRP	C-reactive protein	P02741	3.686	0.0224	Up	Extracellular Space	other	diagnosis,disease progression,efficacy,prognosis,safety,unspecified application		1401	12944	25419
ITIH3	inter-alpha-trypsin inhibitor heavy chain 3	Q06033	1.197	0.0363		Extracellular Space	other			3699	16426	50693
Systemic Lupus Erythematosus Signaling
Symbol	Entrez Gene Name	GenPept/UniProt/Swiss-Prot Accession	Expr Fold Change	Expr p-value	Expected	Location	Type(s)	Biomarker Application(s)	Drug(s)	Entrez Gene ID for Human	Entrez Gene ID for Mouse	Entrez Gene ID for Rat
C9	complement C9	P02748	1.594	0.0133		Extracellular Space	other	unspecified application		735	12279	117512
C8A	complement C8 alpha chain	P07357	1.349	0.0422		Extracellular Space	other			731	230558	298288
C8B	complement C8 beta chain	P07358	1.216	0.0422		Extracellular Space	other			732	110382	313421
C8G	complement C8 gamma chain	P07360	1.334	0.0189		Extracellular Space	transporter			733	69379	296545
© 2000-2020 QIAGEN. All rights reserved.
